# Supplementary material for: New coordination polymers based on 2-methylimidazole and transition metal nitroprusside containing building blocks: synthesis, structure and magnetic properties
Source: Royal Society of Chemistry journal article supplement (doi:10.1039/c7nj03585c), 2017-12-15
Supplement: c7nj03585c1.pdf [file c7nj03585c1.pdf]

Electronic Supplementary Information (ESI) for the article entitled:

**“New coordination polymers based on 2-methylimidazole and transition metal nitroprussides containing building blocks: Synthesis, structure and magnetic properties”**

by A. Di Santo<sup>1</sup>, H. Osiry<sup>2</sup>, E. Reguera<sup>2</sup>, P. Alborés<sup>3,+</sup>, R.E. Carbonio<sup>4,+</sup>, A. Ben Altabef<sup>1,+</sup>,  
Diego M. Gil<sup>1,\*,+</sup>.

**Figure S1:** Rietveld refinement of powder XRD pattern for  $\text{Mn}(\text{2-MeIm})_2[\text{Fe}(\text{CN})_5\text{NO}]$ . Red points: experimental data. Black line: calculated profile. Blue vertical lines: allowed Bragg positions. Blue line: difference between experimental and calculated profiles.

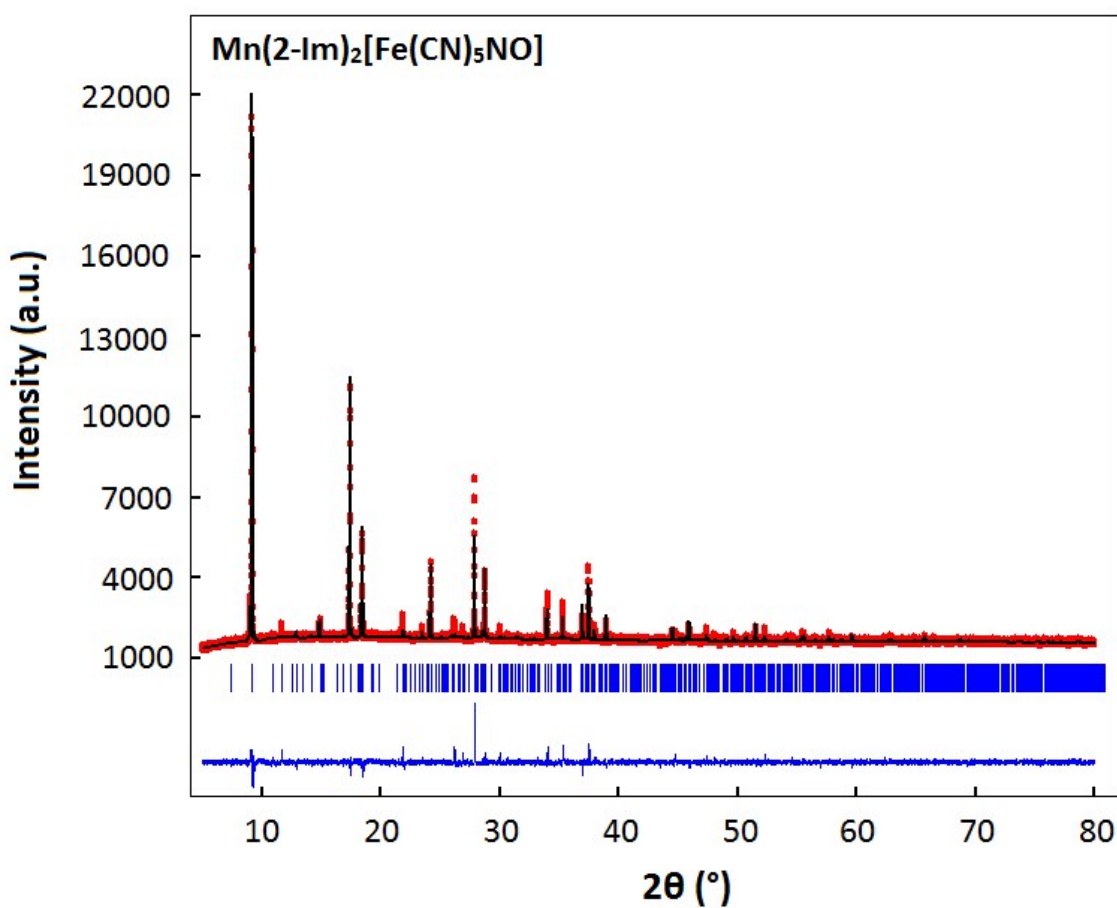

**Figure S2:** Rietveld refinement of powder XRD pattern for  $\text{Fe}(\text{2-MeIm})_2[\text{Fe}(\text{CN})_5\text{NO}]$ . Red points: experimental data. Black line: calculated profile. Blue vertical lines: allowed Bragg positions. Blue line: difference between experimental and calculated profiles.

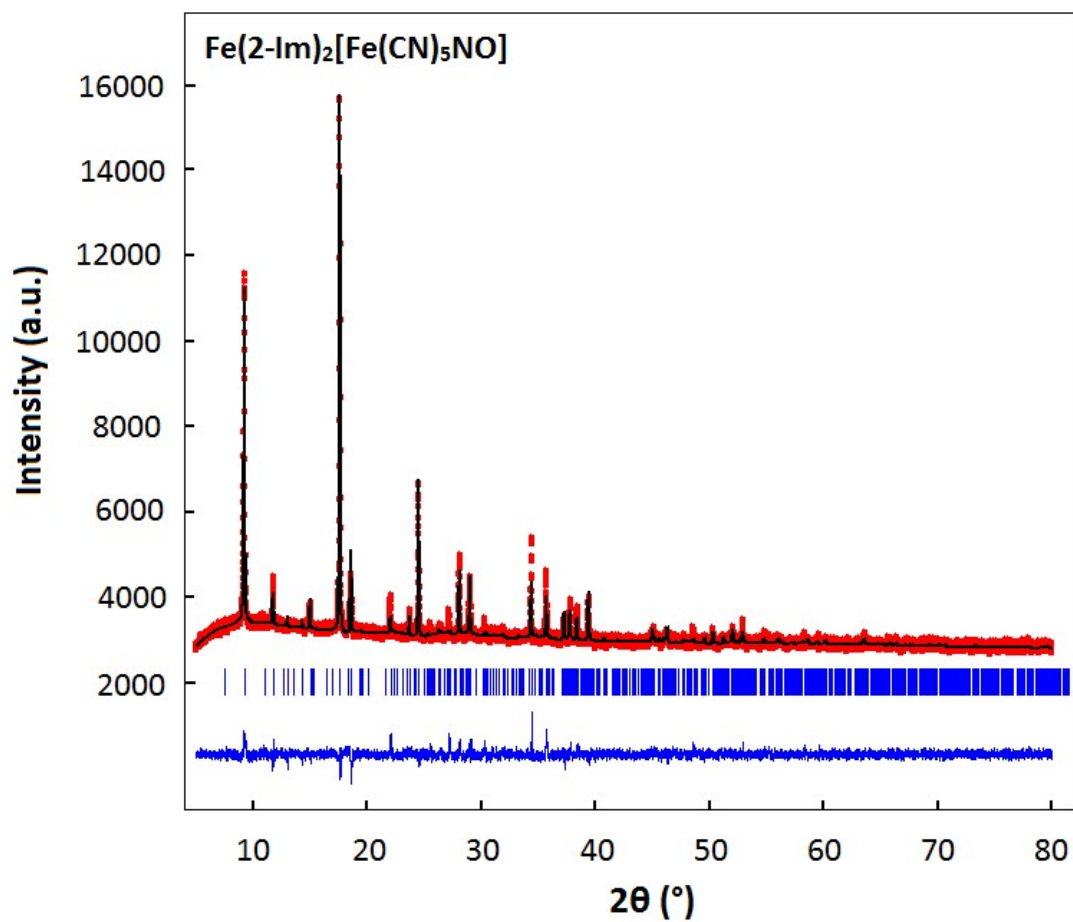

**Figure S3:** Rietveld refinement of powder XRD pattern for  $\text{Co}(\text{2-Im})_2[\text{Fe}(\text{CN})_5\text{NO}]$ . Red points: experimental data. Black line: calculated profile. Blue vertical lines: allowed Bragg positions. Blue line: difference between experimental and calculated profiles.

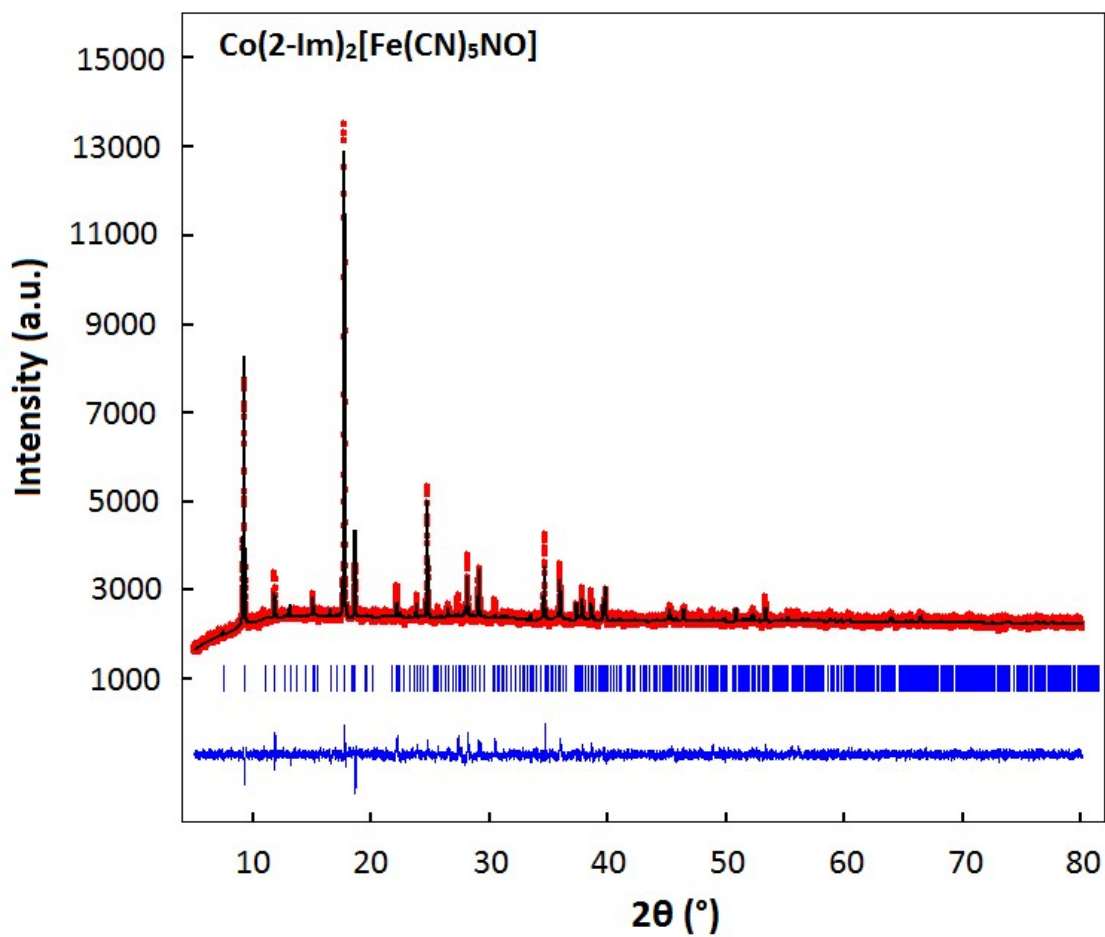

**Figure S4:** Diffuse reflectance UV-Vis spectra of the solids intercalated  $T(2\text{-Melm})_2[\text{Fe}(\text{CN})_5\text{NO}] \cdot 2\text{H}_2\text{O}$  ( $T = \text{Mn, Ni, Co and Fe}$ ).

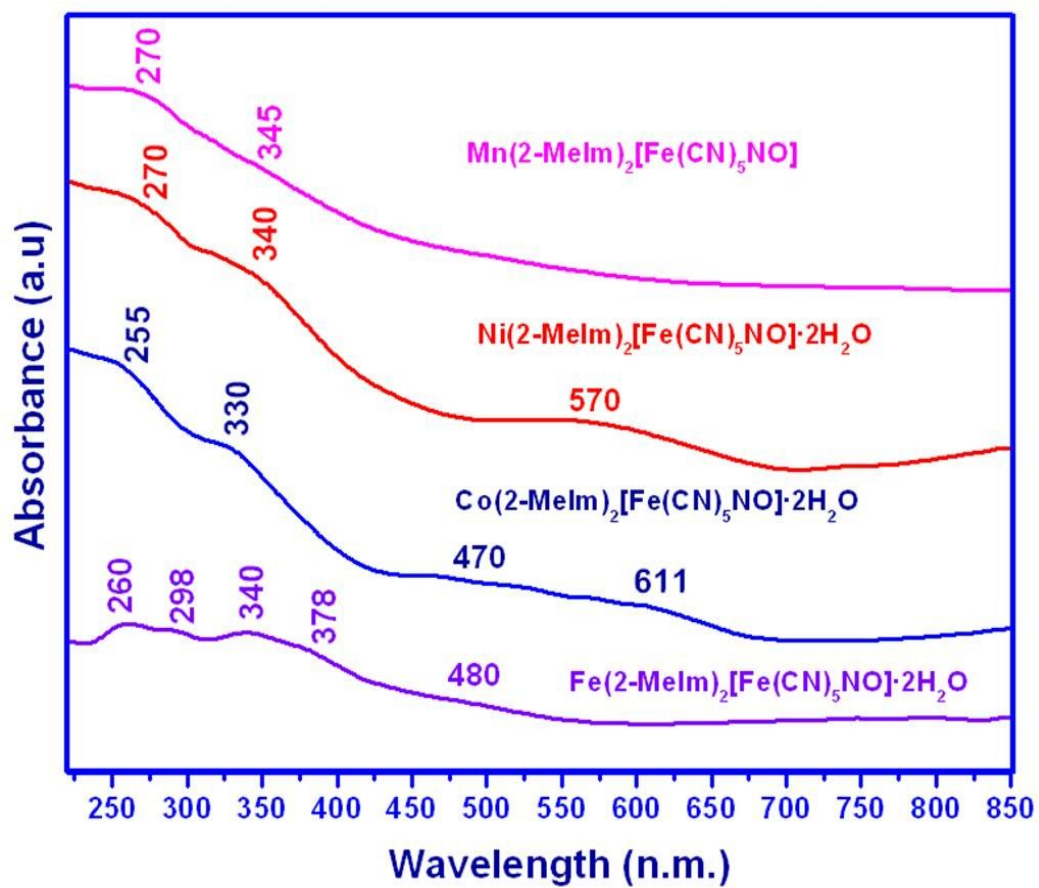

**Figure S5:** TG and DTA curves for the thermal decomposition of  $\text{Mn(2-Melm)}_2[\text{Fe(CN)}_5\text{NO}]$  in air.

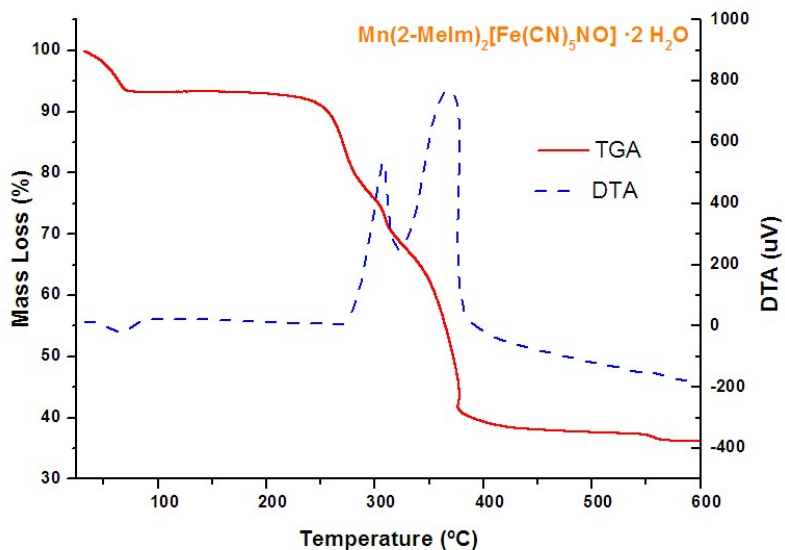

**Figure S6:** TG and DTA curves for the thermal decomposition of  $\text{Mn(2-Melm)}_2[\text{Fe(CN)}_5\text{NO}] \cdot 2\text{H}_2\text{O}$  in air.

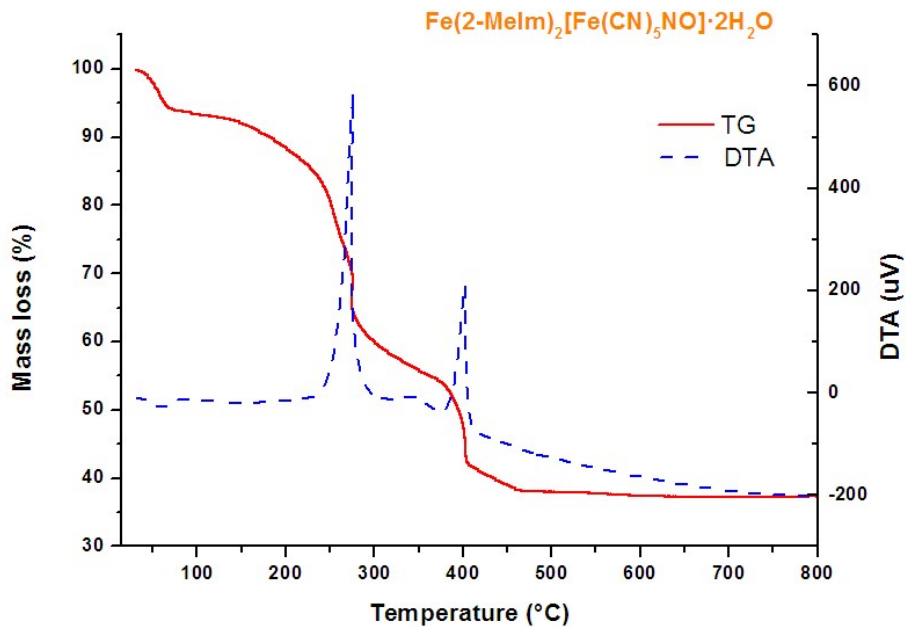

**Figure S7:** TG and DTA curves for the thermal decomposition of  $\text{Co}(2\text{-Melm})_2[\text{Fe}(\text{CN})_5\text{NO}] \cdot 2\text{H}_2\text{O}$  in air.

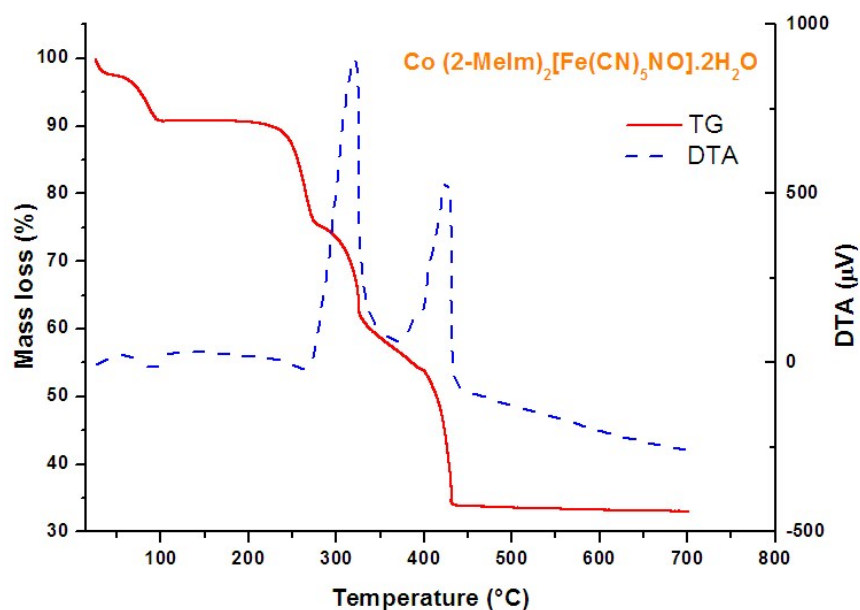

**Figure S8:** TG and DTA curves for the thermal decomposition of  $\text{Ni}(2\text{-Melm})_2[\text{Fe}(\text{CN})_5\text{NO}] \cdot 2\text{H}_2\text{O}$  in air.

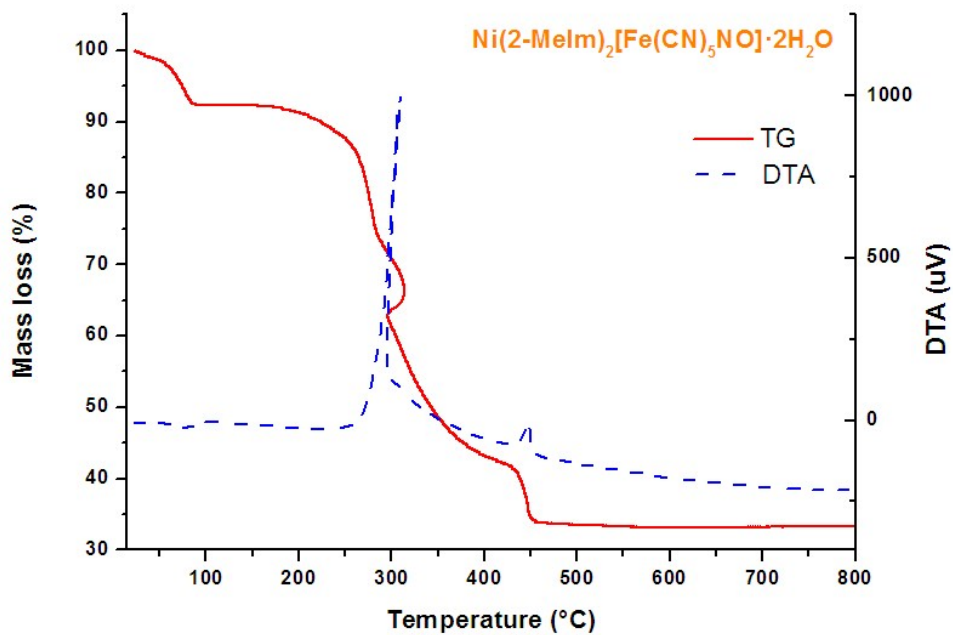

**Figure S9:**  $\chi^1$  vs  $T$  plots for all reported complexes at 80 Oe. Full lines correspond to the Curie-Weiss fitting.

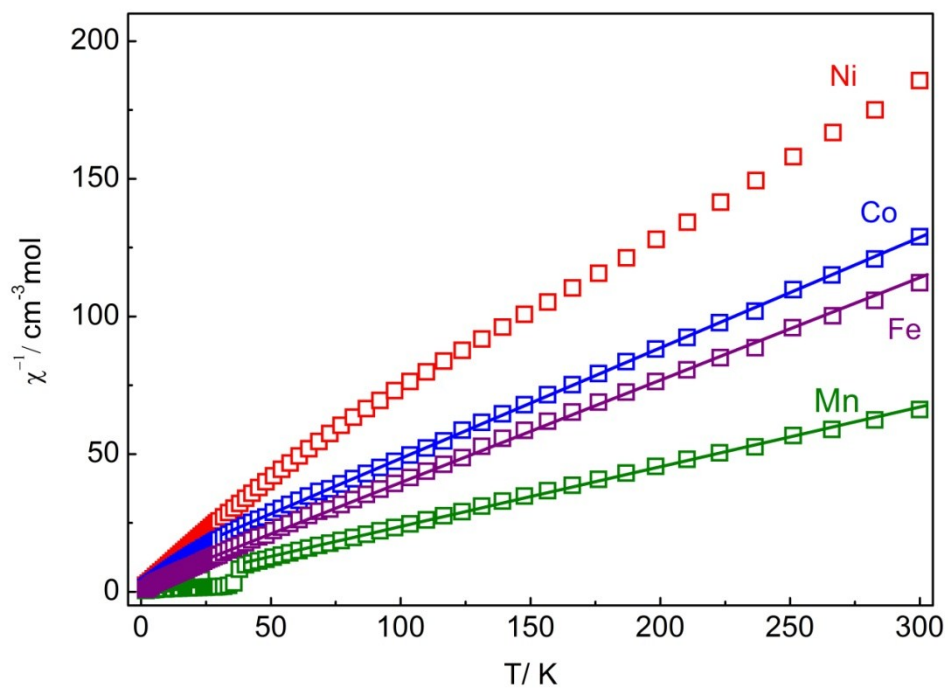

**Figure S10:**  $M$  vs  $H$  plots in the range -70 -70 kOe applied field for all reported complexes at 1.8 K.

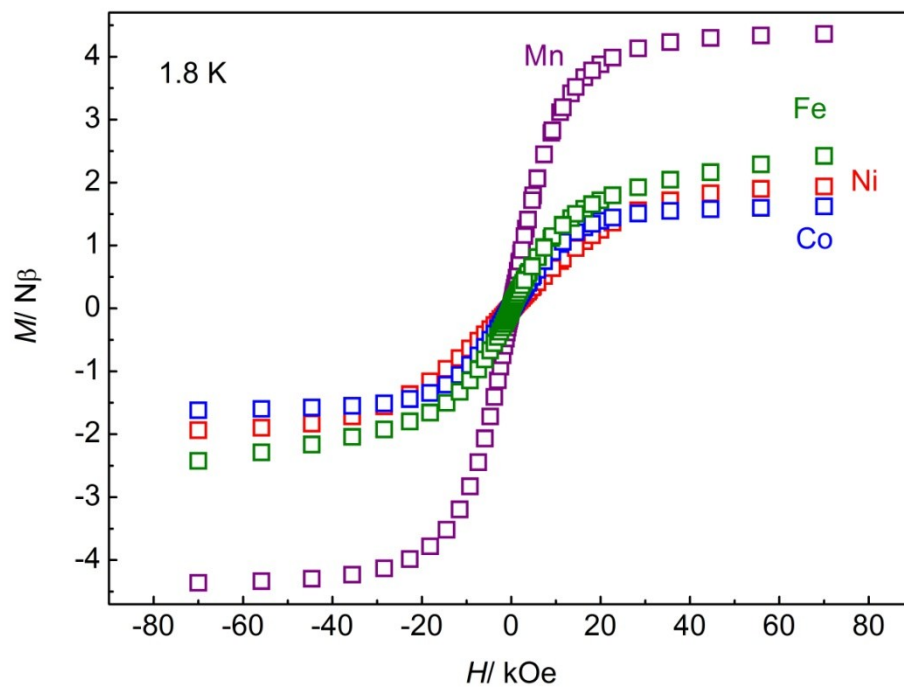



**Table S1:** Atomic coordinates and equivalent isotropic displacement parameters for Mn(2-Im)<sub>2</sub>[Fe(CN)<sub>5</sub>NO]·2H<sub>2</sub>O.

| Atom | Wyck. | x           | y          | z           | Uiso*/Ueq |
|------|-------|-------------|------------|-------------|-----------|
| Fe   | 4a    | 0.0032 (8)  | 0.9974 (2) | 0.2211 (2)  | 0.036 (1) |
| Mn   | 4a    | 0.0008 (4)  | 0.7476 (2) | 0.7351 (3)  | 0.036 (1) |
| C1   | 4a    | 0.0006 (9)  | 0.9042 (5) | 0.4006 (8)  | 0.047 (2) |
| C2   | 4a    | -0.0061 (6) | 1.0904 (5) | 0.0431 (8)  | 0.047 (2) |
| C3   | 4a    | 0.0003 (9)  | 1.0897 (5) | 0.4024 (8)  | 0.047 (2) |
| C4   | 4a    | -0.0059 (6) | 0.9050 (6) | 0.0414 (9)  | 0.047 (2) |
| C5   | 4a    | -0.0971 (1) | 0.997 (1)  | 0.233 (1)   | 0.047 (2) |
| C6   | 4a    | 0.1600 (1)  | 0.8292 (5) | 0.732 (2)   | 0.047 (2) |
| C7   | 4a    | 0.2319 (1)  | 0.7210 (5) | 0.791 (2)   | 0.047 (2) |
| C8   | 4a    | 0.1667 (1)  | 0.6889 (4) | 0.791 (2)   | 0.047 (2) |
| C9   | 4a    | 0.1322 (2)  | 0.9177 (5) | 0.687 (1)   | 0.047 (2) |
| C10  | 4a    | -0.1589 (1) | 0.8178 (5) | 0.732 (2)   | 0.047 (2) |
| C11  | 4a    | -0.2275 (2) | 0.7025 (6) | 0.724 (2)   | 0.047 (2) |
| C12  | 4a    | -0.1609 (1) | 0.6745 (5) | 0.726 (2)   | 0.047 (2) |
| C13  | 4a    | -0.1338 (1) | 0.9102 (4) | 0.740 (2)   | 0.047 (2) |
| N1   | 4a    | 0.0033 (8)  | 0.8511 (5) | 0.5086 (7)  | 0.047 (2) |
| N2   | 4a    | -0.0102 (8) | 1.1433 (4) | -0.0677 (7) | 0.047 (2) |
| N3   | 4a    | 0.0013 (5)  | 1.1434 (5) | 0.5105 (8)  | 0.047 (2) |
| N4   | 4a    | -0.0086 (8) | 0.8550 (4) | -0.0740 (6) | 0.047 (2) |
| N5   | 4a    | -0.1570 (1) | 0.997 (1)  | 0.240 (1)   | 0.047 (2) |
| N6   | 4a    | 0.0895 (1)  | 0.997 (1)  | 0.210 (8)   | 0.047 (2) |
| N7   | 4a    | 0.1200 (1)  | 0.7564 (8) | 0.754 (2)   | 0.047 (2) |
| N8   | 4a    | 0.2286 (2)  | 0.8107 (4) | 0.753 (2)   | 0.047 (2) |
| N9   | 4a    | -0.1164 (1) | 0.7465 (9) | 0.730 (1)   | 0.047 (2) |
| N10  | 4a    | -0.2270 (2) | 0.7940 (4) | 0.729 (1)   | 0.047 (2) |
| O1   | 4a    | 0.1483 (9)  | 0.9976 (9) | 0.2031 (7)  | 0.047 (2) |
| O2   | 4a    | -0.1254 (1) | 1.2070 (3) | 0.2023 (8)  | 0.149 (1) |
| O3   | 4a    | 0.3726 (1)  | 0.7508 (6) | 0.777 (1)   | 0.149 (1) |

**Table S2:** Selected bond lengths (Å) and bond angle (°) for Mn(2-MIm)<sub>2</sub>[Fe(CN)<sub>5</sub>NO]·2H<sub>2</sub>O.

| Bond distances (Å)   |            |                                         |            |
|----------------------|------------|-----------------------------------------|------------|
| Fe—C1                | 1.930 (7)  | C4—N4                                   | 1.137 (9)  |
| Fe—C2                | 1.928 (7)  | C5—N5                                   | 1.149 (3)  |
| Fe—C3                | 1.929 (7)  | N6—O1                                   | 1.128 (18) |
| Fe—C4                | 1.930 (9)  | N7—C6                                   | 1.351 (12) |
| Fe—C5                | 1.924 (15) | N7—C8                                   | 1.385 (11) |
| Fe—N6                | 1.656 (16) | C6—N8                                   | 1.353 (5)  |
| Mn—N1                | 2.284 (7)  | N8—C7                                   | 1.387 (10) |
| Mn—N2 <sup>i</sup>   | 2.008 (7)  | C7—C8                                   | 1.341 (4)  |
| Mn—N3 <sup>ii</sup>  | 2.444 (7)  | C6—C9                                   | 1.478 (10) |
| Mn—N4 <sup>iii</sup> | 2.153 (6)  | N9—C10                                  | 1.352 (13) |
| Mn—N7                | 2.293 (8)  | N9—C12                                  | 1.384 (12) |
| Mn—N9                | 2.247 (8)  | C10—N10                                 | 1.354 (5)  |
| C1—N1                | 1.130 (9)  | N10—C11                                 | 1.384 (11) |
| C2—N2                | 1.144 (9)  | C11—C12                                 | 1.345 (6)  |
| C3—N3                | 1.136 (10) | C10—C13                                 | 1.479 (9)  |
| Bond Angles (°)      |            |                                         |            |
| Fe—C1—N1             | 175.6 (8)  | Mn—N2 <sup>i</sup> —C2 <sup>i</sup>     | 168.2 (8)  |
| Fe—C2—N2             | 177.1 (7)  | Mn—N3 <sup>ii</sup> —C3 <sup>ii</sup>   | 174.2 (7)  |
| Fe—C3—N3             | 177.3 (8)  | Mn—N4 <sup>iii</sup> —C4 <sup>iii</sup> | 169.5 (8)  |
| Fe—C4—N4             | 174.5 (7)  | Mn—N7—C6                                | 127.3 (7)  |
| Fe—C5—N5             | 179.8 (13) | Mn—N7—C8                                | 127.8 (7)  |
| Fe—N6—O1             | 179 (6)    | Mn—N9—C10                               | 126.6 (7)  |
| C1—Fe—C2             | 173.2 (7)  | Mn—N9—C12                               | 128.5 (7)  |
| C1—Fe—C3             | 93.3 (6)   | N1—Mn—N2 <sup>i</sup>                   | 95.2 (5)   |
| C1—Fe—C4             | 86.3 (5)   | N1—Mn—N3 <sup>ii</sup>                  | 176.9 (5)  |
| C1—Fe—C5             | 86.6 (8)   | N1—Mn—N4 <sup>iii</sup>                 | 87.6 (3)   |
| C1—Fe—N6             | 93.3 (17)  | N1—Mn—N7                                | 89.0 (6)   |
| C2—Fe—C3             | 86.4 (5)   | N1—Mn—N9                                | 90.8 (6)   |
| C2—Fe—C4             | 93.3 (6)   | N2 <sup>i</sup> —Mn—N3 <sup>ii</sup>    | 87.8 (4)   |
| C2—Fe—C5             | 86.6 (7)   | N2 <sup>i</sup> —Mn—N4 <sup>iii</sup>   | 177.1 (5)  |
| C2—Fe—N6             | 93.5 (15)  | N2 <sup>i</sup> —Mn—N7                  | 89.6 (6)   |
| C3—Fe—C4             | 173.2 (7)  | N2 <sup>i</sup> —Mn—N9                  | 94.2 (6)   |
| C3—Fe—C5             | 86.7 (8)   | N3 <sup>ii</sup> —Mn—N4 <sup>iii</sup>  | 89.3 (4)   |
| C3—Fe—N6             | 93.7 (17)  | N3 <sup>ii</sup> —Mn—N7                 | 90.4 (5)   |
| C4—Fe—C5             | 86.5 (8)   | N3 <sup>ii</sup> —Mn—N9                 | 89.5 (5)   |
| C4—Fe—N6             | 93.1 (16)  | N4 <sup>iii</sup> —Mn—N7                | 90.0 (6)   |
| C5—Fe—N6             | 179.6 (8)  | N4 <sup>iii</sup> —Mn—N9                | 86.1 (6)   |
| Mn—N1—C1             | 175.6 (7)  | N7—Mn—N9                                | 176.2 (3)  |

Symmetry codes: (i)  $-x, y-1/2, -z+1/2$ ; (ii)  $-x, y-1/2, -z+3/2$ ; (iii)  $x, y, z+1$ .**Table S3:** Hydrogen bond distances (Å) for Mn(2-MIm)<sub>2</sub>[Fe(CN)<sub>5</sub>NO]·2H<sub>2</sub>O..

| D—H···A                | D···A     |
|------------------------|-----------|
| O2···N10 <sup>iv</sup> | 2.835 (4) |
| O3···N8                | 2.910 (5) |

Symmetry code: (iv)  $-1/2-x, 2-y, -1/2+z$ .

**Table S4:** Atomic coordinates and equivalent isotropic displacement parameters for Fe(2-Im)<sub>2</sub>[Fe(CN)<sub>5</sub>NO]·2H<sub>2</sub>O.

| Atom | Wyck. | x           | y          | z           | Uiso*/Ueq |
|------|-------|-------------|------------|-------------|-----------|
| Fe1  | 4a    | 0.0033 (2)  | 0.9978 (2) | 0.2212 (2)  | 0.037(1)  |
| Fe2  | 4a    | 0.0012 (5)  | 0.7438 (2) | 0.7570 (6)  | 0.037(1)  |
| C1   | 4a    | 0.0045 (2)  | 0.9026 (4) | 0.4006 (7)  | 0.050(3)  |
| C2   | 4a    | -0.006 (1)  | 1.0918 (4) | 0.0410 (8)  | 0.050(3)  |
| C3   | 4a    | 0.0005 (2)  | 1.0911 (4) | 0.4048 (6)  | 0.050(3)  |
| C4   | 4a    | -0.0020 (1) | 0.9037 (4) | 0.0406 (8)  | 0.050(3)  |
| C5   | 4a    | -0.0976 (2) | 0.997 (1)  | 0.233 (1)   | 0.050(3)  |
| C6   | 4a    | 0.1627 (2)  | 0.8185 (5) | 0.754 (2)   | 0.050(3)  |
| C7   | 4a    | 0.2317 (3)  | 0.7020 (4) | 0.754 (2)   | 0.050(3)  |
| C8   | 4a    | 0.1648 (2)  | 0.6736 (5) | 0.754 (2)   | 0.050(3)  |
| C9   | 4a    | 0.1376 (2)  | 0.9118 (4) | 0.750 (2)   | 0.050(3)  |
| C10  | 4a    | -0.1582 (2) | 0.8185 (5) | 0.752 (2)   | 0.050(3)  |
| C11  | 4a    | -0.2273 (3) | 0.7021 (5) | 0.744 (3)   | 0.050(3)  |
| C12  | 4a    | -0.1603 (2) | 0.6738 (5) | 0.746 (2)   | 0.050(3)  |
| C13  | 4a    | -0.1329 (2) | 0.9118 (4) | 0.760 (2)   | 0.050(3)  |
| N1   | 4a    | -0.0004 (8) | 0.8508 (4) | 0.5137 (7)  | 0.050(3)  |
| N2   | 4a    | -0.0094 (7) | 1.1468 (4) | -0.0654 (5) | 0.050(3)  |
| N3   | 4a    | 0.002 (1)   | 1.1447 (4) | 0.5165 (7)  | 0.050(3)  |
| N4   | 4a    | 0.0012 (9)  | 0.8451 (3) | -0.0585 (6) | 0.050(3)  |
| N5   | 4a    | -0.1580 (2) | 0.997 (1)  | 0.241 (1)   | 0.050(3)  |
| N6   | 4a    | 0.0903 (2)  | 0.998 (1)  | 0.210 (8)   | 0.050(3)  |
| N7   | 4a    | 0.1200 (2)  | 0.7464 (9) | 0.754 (3)   | 0.050(3)  |
| N8   | 4a    | 0.2313 (2)  | 0.7945 (4) | 0.754 (2)   | 0.050(3)  |
| N9   | 4a    | -0.1155 (2) | 0.7465 (9) | 0.750 (3)   | 0.050(3)  |
| N10  | 4a    | -0.2268 (2) | 0.7945 (4) | 0.749 (2)   | 0.050(3)  |
| O1   | 4a    | 0.1495 (1)  | 0.9981 (9) | 0.2030 (7)  | 0.050(3)  |
| O2   | 4a    | -0.1261 (5) | 1.2075 (2) | 0.213 (1)   | 0.125(6)  |
| O3   | 4a    | 0.3690 (4)  | 0.7505 (5) | 0.7616 (2)  | 0.125(6)  |

**Table S5:** Selected bond angle (°) for Fe(2-MIm)<sub>2</sub>[Fe(CN)<sub>5</sub>NO]·2H<sub>2</sub>O.

| Bond distances (Å)    |            |                                          |            |
|-----------------------|------------|------------------------------------------|------------|
| Fe1—C1                | 1.930 (6)  | C4—N4                                    | 1.136 (7)  |
| Fe1—C2                | 1.929 (7)  | C5—N5                                    | 1.151 (5)  |
| Fe1—C3                | 1.931 (6)  | N6—O1                                    | 1.128 (5)  |
| Fe1—C4                | 1.926 (6)  | N7—C6                                    | 1.351 (13) |
| Fe1—C5                | 1.922 (5)  | N7—C8                                    | 1.384 (13) |
| Fe1—N6                | 1.657 (6)  | C6—N8                                    | 1.354 (6)  |
| Fe2—N1                | 2.383 (7)  | N8—C7                                    | 1.385 (8)  |
| Fe2—N2 <sup>i</sup>   | 2.016 (7)  | C7—C8                                    | 1.342 (7)  |
| Fe2—N3 <sup>ii</sup>  | 2.214 (7)  | C6—C9                                    | 1.477 (9)  |
| Fe2—N4 <sup>iii</sup> | 2.023 (6)  | N9—C10                                   | 1.350 (13) |
| Fe2—N7                | 2.261 (10) | N9—C12                                   | 1.383 (13) |
| Fe2—N9                | 2.221 (10) | C10—N10                                  | 1.354 (6)  |
| C1—N1                 | 1.133 (8)  | N10—C11                                  | 1.384 (10) |
| C2—N2                 | 1.130 (8)  | C11—C12                                  | 1.344 (7)  |
| C3—N3                 | 1.141 (8)  | C10—C13                                  | 1.479 (9)  |
| Bond Angles (°)       |            |                                          |            |
| Fe1—C1—N1             | 173.2 (7)  | Fe1—N2 <sup>i</sup> —C2 <sup>i</sup>     | 172.3 (7)  |
| Fe1—C2—N2             | 178.0 (6)  | Fe1—N3 <sup>ii</sup> —C3 <sup>ii</sup>   | 176.0 (6)  |
| Fe1—C3—N3             | 176.6 (6)  | Fe1—N4 <sup>iii</sup> —C4 <sup>iii</sup> | 176.0 (6)  |
| Fe1—C4—N4             | 172.9 (6)  | Fe1—N7—C6                                | 127.9 (9)  |
| Fe1—C5—N5             | 179.5 (5)  | Fe1—N7—C8                                | 127.0 (8)  |
| Fe1—N6—O1             | 179.8 (5)  | Fe1—N9—C10                               | 128.0 (9)  |
| C1—Fe1—C2             | 175.4 (6)  | Fe1—N9—C12                               | 127.0 (8)  |
| C1—Fe1—C3             | 94.0 (4)   | N1—Fe2—N2 <sup>i</sup>                   | 88.6 (4)   |
| C1—Fe1—C4             | 85.3 (4)   | N1—Fe2—N3 <sup>ii</sup>                  | 177.7 (5)  |
| C1—Fe1—C5             | 88.7 (5)   | N1—Fe2—N4 <sup>iii</sup>                 | 89.1 (3)   |
| C1—Fe1—N6             | 91.3 (15)  | N1—Fe2—N7                                | 89.7 (7)   |
| C2—Fe1—C3             | 86.3 (4)   | N1—Fe2—N9                                | 87.6 (7)   |
| C2—Fe1—C4             | 94.0 (5)   | N2 <sup>i</sup> —Fe2—N3 <sup>ii</sup>    | 91.7 (4)   |
| C2—Fe1—C5             | 86.7 (7)   | N2 <sup>i</sup> —Fe2—N4 <sup>iii</sup>   | 175.0 (5)  |
| C2—Fe1—N6             | 93.3 (15)  | N2 <sup>i</sup> —Fe2—N7                  | 85.9 (7)   |
| C3—Fe1—C4             | 175.4 (5)  | N2 <sup>i</sup> —Fe2—N9                  | 94.3 (7)   |
| C3—Fe1—C5             | 86.9 (5)   | N3 <sup>ii</sup> —Fe2—N4 <sup>iii</sup>  | 90.7 (4)   |
| C3—Fe1—N6             | 93.4 (16)  | N3 <sup>ii</sup> —Fe2—N7                 | 92.6 (8)   |
| C4—Fe1—C5             | 88.5 (5)   | N3 <sup>ii</sup> —Fe2—N9                 | 90.1 (5)   |
| C4—Fe1—N6             | 91.2 (14)  | N4 <sup>iii</sup> —Fe2—N7                | 89.6 (7)   |
| C5—Fe1—N6             | 179.6 (5)  | N4 <sup>iii</sup> —Fe2—N9                | 90.1 (8)   |
| Fe1—N1—C1             | 174.4 (7)  | N7—Fe2—N9                                | 177.2 (5)  |

Symmetry codes: (i)  $-x, y-1/2, -z+1/2$ ; (ii)  $-x, y-1/2, -z+3/2$ ; (iii)  $x, y, z+1$ .**Table S6:** Hydrogen bond distances (Å) for Fe(2-MIm)<sub>2</sub>[Fe(CN)<sub>5</sub>NO]·2H<sub>2</sub>O.

| D—H...A                | D...A     |
|------------------------|-----------|
| O2...N10 <sup>iv</sup> | 2.811 (1) |
| O3...N8                | 2.702 (8) |

Symmetry code: (iv)  $-1/2-x, 2-y, -1/2+z$ .

**Table S7:** Atomic coordinates and equivalent isotropic displacement parameters for  $\text{Co}(\text{2-Im})_2[\text{Fe}(\text{CN})_5\text{NO}] \cdot 2\text{H}_2\text{O}$

| Atom | Wyck. | x           | y          | z           | Uiso*/Ueq |
|------|-------|-------------|------------|-------------|-----------|
| Fe   | 4a    | 0.0159 (7)  | 0.9993 (2) | 0.249 (1)   | 0.035 (2) |
| Co   | 4a    | 0.0063 (1)  | 0.7431 (2) | 0.7362 (3)  | 0.035 (2) |
| C1   | 4a    | 0.0153 (6)  | 0.9058 (6) | 0.4373 (8)  | 0.046 (3) |
| C2   | 4a    | 0.0048 (6)  | 1.0922 (6) | 0.0642 (8)  | 0.046 (3) |
| C3   | 4a    | 0.0163 (5)  | 1.0949 (6) | 0.4307 (8)  | 0.046 (3) |
| C4   | 4a    | 0.0032 (7)  | 0.9035 (6) | 0.0697 (7)  | 0.046 (3) |
| C5   | 4a    | -0.0850 (2) | 1.000 (1)  | 0.271 (2)   | 0.046 (3) |
| C6   | 4a    | 0.1664 (3)  | 0.8199 (5) | 0.762 (2)   | 0.046 (3) |
| C7   | 4a    | 0.2359 (4)  | 0.7036 (5) | 0.784 (1)   | 0.046 (3) |
| C8   | 4a    | 0.1693 (3)  | 0.6744 (5) | 0.772 (2)   | 0.046 (3) |
| C9   | 4a    | 0.1427 (2)  | 0.9165 (5) | 0.754 (3)   | 0.046 (3) |
| C10  | 4a    | -0.1480 (2) | 0.8254 (5) | 0.731 (2)   | 0.046 (3) |
| C11  | 4a    | -0.2256 (4) | 0.7172 (6) | 0.732 (2)   | 0.046 (3) |
| C12  | 4a    | -0.1608 (3) | 0.6809 (5) | 0.733 (2)   | 0.046 (3) |
| C13  | 4a    | -0.1179 (2) | 0.9207 (4) | 0.729 (2)   | 0.046 (3) |
| N1   | 4a    | 0.0177 (5)  | 0.8493 (5) | 0.5438 (7)  | 0.046 (3) |
| N2   | 4a    | -0.0066 (6) | 1.1501 (5) | -0.0338 (7) | 0.046 (3) |
| N3   | 4a    | 0.0165 (5)  | 1.1493 (5) | 0.5419 (7)  | 0.046 (3) |
| N4   | 4a    | -0.0045 (6) | 0.8446 (5) | -0.0298 (6) | 0.046 (3) |
| N5   | 4a    | -0.1454 (2) | 1.001 (1)  | 0.2847 (9)  | 0.046 (3) |
| N6   | 4a    | 0.1027 (2)  | 0.998 (1)  | 0.230 (1)   | 0.046 (3) |
| N7   | 4a    | 0.1241 (2)  | 0.7470 (7) | 0.758 (2)   | 0.046 (3) |
| N8   | 4a    | 0.2351 (3)  | 0.7966 (4) | 0.7776 (1)  | 0.046 (3) |
| N9   | 4a    | -0.1108 (2) | 0.7483 (7) | 0.732 (2)   | 0.046 (3) |
| N10  | 4a    | -0.2182 (3) | 0.8096 (4) | 0.732 (2)   | 0.046 (3) |
| O1   | 4a    | 0.1619 (2)  | 0.9972 (9) | 0.2170 (8)  | 0.046 (3) |
| O2   | 4a    | -0.1207 (3) | 1.2096 (4) | 0.1927 (9)  | 0.155 (8) |
| O3   | 4a    | 0.3732 (1)  | 0.7513 (4) | 0.7650 (8)  | 0.155 (8) |

**Table S8:** Selected bond lengths (Å) and bond angle (°) for Co(2-MIm)<sub>2</sub>[Fe(CN)<sub>5</sub>NO]·2H<sub>2</sub>O.

| Bond distances (Å)   |            |                                         |            |
|----------------------|------------|-----------------------------------------|------------|
| Fe—C1                | 1.941 (9)  | C4—N4                                   | 1.141 (10) |
| Fe—C2                | 1.929 (9)  | C5—N5                                   | 1.152 (6)  |
| Fe—C3                | 1.931 (9)  | N6—O1                                   | 1.129 (5)  |
| Fe—C4                | 1.937 (9)  | N7—C6                                   | 1.352 (11) |
| Fe—C5                | 1.924 (14) | N7—C8                                   | 1.385 (11) |
| Fe—N6                | 1.655 (14) | C6—N8                                   | 1.355 (8)  |
| Co—N1                | 2.112 (7)  | N8—C7                                   | 1.387 (10) |
| Co—N2 <sup>i</sup>   | 2.008 (7)  | C7—C8                                   | 1.341 (10) |
| Co—N3 <sup>ii</sup>  | 2.163 (7)  | C6—C9                                   | 1.509 (10) |
| Co—N4 <sup>iii</sup> | 2.270 (7)  | N9—C10                                  | 1.349 (11) |
| Co—N7                | 2.244 (4)  | N9—C12                                  | 1.382 (10) |
| Co—N9                | 2.226 (4)  | C10—N10                                 | 1.354 (7)  |
| C1—N1                | 1.138 (10) | N10—C11                                 | 1.384 (11) |
| C2—N2                | 1.134 (11) | C11—C12                                 | 1.345 (10) |
| C3—N3                | 1.138 (10) | C10—C13                                 | 1.531 (9)  |
| Bond Angles (°)      |            |                                         |            |
| Fe—C1—N1             | 176.8 (9)  | Co—N2 <sup>i</sup> —C2 <sup>i</sup>     | 166.8 (8)  |
| Fe—C2—N2             | 173.4 (9)  | Co—N3 <sup>ii</sup> —C3 <sup>ii</sup>   | 167.5 (8)  |
| Fe—C3—N3             | 177.9 (9)  | Co—N4 <sup>iii</sup> —C4 <sup>iii</sup> | 164.6 (8)  |
| Fe—C4—N4             | 177.1 (9)  | Co—N7—C6                                | 128.0 (6)  |
| Fe—C5—N5             | 179.5 (12) | Co—N7—C8                                | 127.1 (6)  |
| Fe—N6—O1             | 179.9 (13) | Co—N9—C10                               | 123.6 (6)  |
| C1—Fe—C2             | 173.4 (7)  | Co—N9—C12                               | 131.4 (6)  |
| C1—Fe—C3             | 93.4 (7)   | N1—Co—N2 <sup>i</sup>                   | 92.5 (5)   |
| C1—Fe—C4             | 86.2 (5)   | N1—Co—N3 <sup>ii</sup>                  | 170.6 (6)  |
| C1—Fe—C5             | 86.6 (8)   | N1—Co—N4 <sup>iii</sup>                 | 89.7 (4)   |
| C1—Fe—N6             | 93.1 (8)   | N1—Co—N7                                | 85.6 (5)   |
| C2—Fe—C3             | 86.3 (5)   | N1—Co—N9                                | 93.9 (5)   |
| C2—Fe—C4             | 93.3 (7)   | N2 <sup>i</sup> —Co—N3 <sup>ii</sup>    | 95.0 (4)   |
| C2—Fe—C5             | 86.8 (8)   | N2 <sup>i</sup> —Co—N4 <sup>iii</sup>   | 174.7 (5)  |
| C2—Fe—N6             | 93.5 (8)   | N2 <sup>i</sup> —Co—N7                  | 93.8 (6)   |
| C3—Fe—C4             | 173.1 (7)  | N2 <sup>i</sup> —Co—N9                  | 91.0 (6)   |
| C3—Fe—C5             | 86.8 (7)   | N3 <sup>ii</sup> —Co—N4 <sup>iii</sup>  | 82.4 (4)   |
| C3—Fe—N6             | 93.5 (8)   | N3 <sup>ii</sup> —Co—N7                 | 99.5 (5)   |
| C4—Fe—C5             | 86.2 (8)   | N3 <sup>ii</sup> —Co—N9                 | 80.3 (5)   |
| C4—Fe—N6             | 93.5 (9)   | N4 <sup>iii</sup> —Co—N7                | 91.2 (5)   |
| C5—Fe—N6             | 179.6 (7)  | N4 <sup>iii</sup> —Co—N9                | 84.1 (5)   |
| Co—N1—C1             | 171.7 (8)  | N7—Co—N9                                | 175.3 (3)  |

Symmetry codes: (i)  $-x, y-1/2, -z+1/2$ ; (ii)  $-x, y-1/2, -z+3/2$ ; (iii)  $x, y, z+1$ .**Table S9:** Hydrogen bond distances (Å) for Co(2-MIm)<sub>2</sub>[Fe(CN)<sub>5</sub>NO]·2H<sub>2</sub>O.

| D—H...A                | D...A     |
|------------------------|-----------|
| O2...N10 <sup>iv</sup> | 3.087 (8) |
| O3...N8                | 2.710 (6) |

Symmetry code: (iv)  $-1/2-x, 2-y, -1/2+z$ .

**Table S10:** Atomic coordinates and equivalent isotropic displacement parameters for Mn(2-Im)<sub>2</sub>[Fe(CN)<sub>5</sub>NO]·2H<sub>2</sub>O.

| Atom | Wyck. | x           | y          | z          | Uiso*/Ueq  |
|------|-------|-------------|------------|------------|------------|
| Fe   | 4a    | 0.002 (1)   | 1.0007 (9) | 0.248 (6)  | 0.036 (7)* |
| Ni   | 4a    | -0.0083 (1) | 0.7506 (9) | 0.751 (5)  | 0.036 (7)* |
| C1   | 4a    | -0.0006 (5) | 0.904 (2)  | 0.432 (4)  | 0.057 (1)* |
| C2   | 4a    | -0.0063 (4) | 1.096 (2)  | 0.067 (4)  | 0.057 (1)* |
| C3   | 4a    | 0.0035 (5)  | 1.094 (2)  | 0.436 (4)  | 0.057 (1)* |
| C4   | 4a    | -0.010 (4)  | 0.906 (2)  | 0.063 (4)  | 0.057 (1)* |
| C5   | 4a    | -0.098 (1)  | 1.004 (5)  | 0.268 (9)  | 0.057 (1)* |
| C6   | 4a    | 0.166 (1)   | 0.810 (2)  | 0.762 (1)  | 0.057 (1)* |
| C7   | 4a    | 0.225 (2)   | 0.684 (1)  | 0.768 (8)  | 0.057 (1)* |
| C8   | 4a    | 0.156 (1)   | 0.664 (2)  | 0.764 (9)  | 0.057 (1)* |
| C9   | 4a    | 0.148 (1)   | 0.908 (1)  | 0.756 (9)  | 0.057 (1)* |
| C10  | 4a    | -0.163 (1)  | 0.816 (1)  | 0.736 (9)  | 0.057 (1)* |
| C11  | 4a    | -0.222 (2)  | 0.689 (2)  | 0.712 (7)  | 0.057 (1)* |
| C12  | 4a    | -0.153 (1)  | 0.669 (1)  | 0.716 (8)  | 0.057 (1)* |
| C13  | 4a    | -0.145 (1)  | 0.913 (1)  | 0.755 (1)  | 0.057 (1)* |
| N1   | 4a    | 0.000 (3)   | 0.849 (1)  | 0.543 (3)  | 0.057 (1)* |
| N2   | 4a    | -0.004 (3)  | 1.151 (1)  | -0.047 (3) | 0.057 (1)* |
| N3   | 4a    | 0.008 (2)   | 1.151 (1)  | 0.544 (3)  | 0.057 (1)* |
| N4   | 4a    | -0.014 (2)  | 0.849 (1)  | -0.043 (3) | 0.057 (1)* |
| N5   | 4a    | -0.1589 (9) | 1.006 (3)  | 0.279 (5)  | 0.057 (1)* |
| N6   | 4a    | 0.0894 (8)  | 0.997 (3)  | 0.232 (6)  | 0.057 (1)* |
| N7   | 4a    | 0.1179 (8)  | 0.743 (3)  | 0.761 (8)  | 0.057 (1)* |
| N8   | 4a    | 0.2326 (9)  | 0.777 (2)  | 0.766 (6)  | 0.057 (1)* |
| N9   | 4a    | -0.1149 (8) | 0.748 (3)  | 0.730 (7)  | 0.057 (1)* |
| N10  | 4a    | -0.229 (1)  | 0.783 (2)  | 0.725 (6)  | 0.057 (1)* |
| O1   | 4a    | 0.1485 (7)  | 0.995 (2)  | 0.220 (4)  | 0.057 (1)* |
| O2   | 4a    | -0.1237 (8) | 1.209 (1)  | 0.210 (4)  | 0.071 (3)* |
| O3   | 4a    | 0.3743 (7)  | 0.752 (3)  | 0.766 (5)  | 0.071 (3)* |

**Table S11:** Selected bond lengths (Å) and bond angle (°) for Ni(2-MIm)<sub>2</sub>[Fe(CN)<sub>5</sub>NO]·2H<sub>2</sub>O.

| Bond distances (Å)   |            |                                         |            |
|----------------------|------------|-----------------------------------------|------------|
| Fe—C1                | 1.94 (4)   | C4—N4                                   | 1.13 (3)   |
| Fe—C2                | 1.91 (4)   | C5—N5                                   | 1.16 (3)   |
| Fe—C3                | 1.92 (4)   | N6—O1                                   | 1.12 (18)  |
| Fe—C4                | 1.93 (4)   | N7—C6                                   | 1.35 (4)   |
| Fe—C5                | 1.91 (3)   | N7—C8                                   | 1.37 (5)   |
| Fe—N6                | 1.67 (2)   | C6—N8                                   | 1.36 (3)   |
| Ni—N1                | 2.08 (3)   | N8—C7                                   | 1.38 (3)   |
| Ni—N2 <sup>i</sup>   | 2.08 (3)   | C7—C8                                   | 1.34 (4)   |
| Ni—N3 <sup>ii</sup>  | 2.07 (3)   | C6—C9                                   | 1.49 (3)   |
| Ni—N4 <sup>iii</sup> | 2.07 (3)   | N9—C10                                  | 1.36 (4)   |
| Ni—N7                | 2.402 (16) | N9—C12                                  | 1.38 (4)   |
| Ni—N9                | 2.031 (16) | C10—N10                                 | 1.35 (3)   |
| C1—N1                | 1.13 (3)   | N10—C11                                 | 1.40 (4)   |
| C2—N2                | 1.15 (3)   | C11—C12                                 | 1.34 (4)   |
| C3—N3                | 1.14 (3)   | C10—C13                                 | 1.48 (2)   |
| Bond Angles (°)      |            |                                         |            |
| Fe—C1—N1             | 177 (4)    | Ni—N2 <sup>i</sup> —C2 <sup>i</sup>     | 176 (4)    |
| Fe—C2—N2             | 173 (4)    | Ni—N3 <sup>ii</sup> —C3 <sup>ii</sup>   | 175(4)     |
| Fe—C3—N3             | 176 (4)    | Ni—N4 <sup>iii</sup> —C4 <sup>iii</sup> | 172 (4)    |
| Fe—C4—N4             | 177 (4)    | Ni—N7—C6                                | 130 (2)    |
| Fe—C5—N5             | 180(3)     | Ni—N7—C8                                | 125 (2)    |
| Fe—N6—O1             | 179 (2)    | Ni—N9—C10                               | 131 (2)    |
| C1—Fe—C2             | 174 (3)    | Ni—N9—C12                               | 123 (2)    |
| C1—Fe—C3             | 93 (3)     | N1—Ni—N2 <sup>i</sup>                   | 89.3 (5)   |
| C1—Fe—C4             | 86 (2)     | N1—Ni—N3 <sup>ii</sup>                  | 175.4 (19) |
| C1—Fe—C5             | 87 (3)     | N1—Ni—N4 <sup>iii</sup>                 | 91.1 (18)  |
| C1—Fe—N6             | 93 (2)     | N1—Ni—N7                                | 89 (2)     |
| C2—Fe—C3             | 87 (2)     | N1—Ni—N9                                | 92 (2)     |
| C2—Fe—C4             | 94 (3)     | N2 <sup>i</sup> —Ni—N3 <sup>ii</sup>    | 89.5 (17)  |
| C2—Fe—C5             | 87 (3)     | N2 <sup>i</sup> —Ni—N4 <sup>iii</sup>   | 176.5 (19) |
| C2—Fe—N6             | 93 (2)     | N2 <sup>i</sup> —Ni—N7                  | 83 (2)     |
| C3—Fe—C4             | 174 (3)    | N2 <sup>i</sup> —Ni—N9                  | 93 (2)     |
| C3—Fe—C5             | 87(3)      | N3 <sup>ii</sup> —Ni—N4 <sup>iii</sup>  | 89.9 (15)  |
| C3—Fe—N6             | 93 (3)     | N3 <sup>ii</sup> —Ni—N7                 | 86.7 (19)  |
| C4—Fe—C5             | 87 (3)     | N3 <sup>ii</sup> —Ni—N9                 | 92 (2)     |
| C4—Fe—N6             | 93 (3)     | N4 <sup>iii</sup> —Ni—N7                | 94 (2)     |
| C5—Fe—N6             | 179.6 (8)  | N4 <sup>iii</sup> —Ni—N9                | 91 (2)     |
| Ni—N1—C1             | 175 (4)    | N7—Ni—N9                                | 175.5 (13) |

Symmetry codes: (i)  $-x, y-1/2, -z+1/2$ ; (ii)  $-x, y-1/2, -z+3/2$ ; (iii)  $x, y, z+1$ .**Table S12:** Hydrogen bond distances (Å) for Ni(2-MIm)<sub>2</sub>[Fe(CN)<sub>5</sub>NO]·2H<sub>2</sub>O.

| D—H...A                | D...A    |
|------------------------|----------|
| O2...N10 <sup>iv</sup> | 2.80 (2) |
| O3...N8                | 2.71 (2) |

Symmetry code: (iv)  $-1/2-x, 2-y, -1/2+z$ .



**Table S13:** IR and Raman bands and tentative assignments for the intercalated solids T(2-Melm)<sub>2</sub>[Fe(CN)<sub>5</sub>NO]·2H<sub>2</sub>O (T= Co, Ni, Mn and Fe).

| 2-Melm             |       | Co(2-Melm) <sub>2</sub> NP |       | Ni(2-Melm) <sub>2</sub> NP |       | Mn(2-Melm) <sub>2</sub> NP |       | Fe(2-Melm) <sub>2</sub> NP |       | Assignment <sup>b</sup>       |
|--------------------|-------|----------------------------|-------|----------------------------|-------|----------------------------|-------|----------------------------|-------|-------------------------------|
| FT-IR <sup>a</sup> | Raman | FT-IR                      | Raman | FT-IR                      | Raman | FT-IR                      | Raman | FT-IR                      | Raman |                               |
| -                  | -     | 3646                       | -     | 3643                       | -     | 3652                       | -     | 3647                       | -     | vH <sub>2</sub> O             |
| -                  | -     | 3567                       | -     | 3566                       | -     | 3570                       | -     | 3568                       | -     | vNH                           |
| 3137 s             | -     | 3150 vw                    | 3154  | 3153 vw                    | 3258  | 3147 vw                    | 3147  | 3150 vw                    | -     | vCH                           |
| 3110 vs            | -     | 3125 s                     | 3126  | 3127 s                     | 3130  | 3123 s                     | 3124  | 3125 s                     | -     | vCH                           |
| 2961 vs            | 2957  | 2964 vw                    | -     | 2965 vw                    | -     | 2966 vw                    | -     | 2962 vw                    | -     | vaCH <sub>3</sub>             |
| 2926 vs            | 2925  | 2931 w                     | 2931  | 2931 w                     | 2931  | 2931w                      | 2931  | 2930 w                     | 2930  | vsCH <sub>3</sub>             |
| -                  | -     | -                          | 2192  | -                          | 2197  | -                          | 2184  | -                          | 2186  | vCN <sub>eq</sub>             |
| -                  | -     | 2180 vs                    | 2179  | 2185 vs                    | 2188  | 2173 vs                    | -     | 2174 vs                    | 2179  | vCN <sub>eq</sub>             |
| -                  | -     | 2165 w                     | 2163  | 2165 w                     | 2165  | -                          | 2160  | 2164 w                     | 2161  | vCN <sub>ax</sub>             |
| -                  | -     | 1936 vs                    | -     | 1937 vs                    | -     | 1934 vs                    | -     | 1935 vs                    | -     | vNO                           |
| -                  | -     | 1604                       | -     | 1605                       | -     | 1605                       | -     | 1606                       | -     | δH <sub>2</sub> O             |
| 1597 vs            | -     | 1569 m                     | -     | 1568 m                     | -     | 1569 m                     | -     | 1566 m                     | -     | vC-N+vC-C                     |
| 1445 s             | 1446  | 1431 w                     | -     | 1433 w                     | -     | 1433 w                     | -     | 1433 w                     | -     | δaCH <sub>3</sub>             |
| 1411 w             | 1416  | 1405 vw                    | -     | 1406 vw                    | 1403  | 1404 vw                    | -     | 1405 vw                    | -     | vC-N+vC-C                     |
| 1373 vs            | 1370  | 1362 m                     | 1360  | 1360 m                     | 1360  | 1361 m                     | 1358  | 1361 m                     | 1358  | δsCH <sub>3</sub>             |
| 1303 vs            | 1303  | 1290 w                     | -     | 1290 w                     | -     | 1289 w                     | -     | 1291 w                     | -     | vC-N+ δC-H +δN-H              |
| 1219 s             | -     | -                          | -     | -                          | -     | -                          | -     | 1193                       | -     | vC-N+δC-H +δN-H               |
| 1155 vs            | 1163  | 1151 w                     | -     | 1154 w                     | -     | 1150 w                     | -     | 1149 w                     | -     | vC-N + δC-H +vC-C             |
| -                  | -     | 1139 s                     | -     | 1141 s                     | -     | 1135 s                     | -     | 1137 s                     | -     | vC-N                          |
| 1115 vs            | 1126  | 1118 m                     | -     | 1122 m                     | -     | 1116 m                     | -     | 1118 m                     | -     | vC-C + δC-H                   |
| 1048 w             | -     | 1054 vvw                   | -     | 1052 vvw                   | -     | 1048 vvw                   | -     | 1048 vvw                   | -     | δC-H + δN-H                   |
| 995 s              | 993   | 1016 m                     | 1010  | 1012 m                     | 1011  | 1008 m                     | 1008  | 1010 m                     | -     | ρCH <sub>3</sub>              |
| 945 s              | 939   | 977 vvs                    | -     | 976 vvs                    | -     | 975 vvs                    | -     | 976 vvs                    | -     | vC-N +δC-H + ρCH <sub>3</sub> |
| 916 s              | 916   | 875 s                      | -     | 873 s                      | -     | 871 s                      | -     | 875 s                      | -     | δring                         |
| -                  | 840   | -                          | -     | -                          | -     | -                          | -     | -                          | -     | γCH                           |
| 743 vs             | -     | 780 m                      | -     | 779 m                      | -     | 777 m                      | -     | 780 m                      | -     | γCH                           |
| 682 vs             | 682   | 681 s                      | 681   | 681 s                      | 683   | 680 s                      | 678   | 680 s                      | 680   | γRing                         |

|       |     |         |     |         |     |         |     |         |     |                                 |
|-------|-----|---------|-----|---------|-----|---------|-----|---------|-----|---------------------------------|
| -     | -   | 667 m   | -   | 667 m   | 665 | 667 m   | 665 | 667 m   | -   | $\delta$ FeNO                   |
| -     | -   | 644 w   | 644 | 643 w   | 643 | 645 w   | 641 | 645 w   | 642 | $\nu$ Fe-N                      |
| 629 s | 629 | 631 vvs | -   | $\gamma$ Ring                   |
| -     | -   | 516 s   | -   | 517 s   | -   | 513 s   | 509 | 513 s   | -   | $\delta$ FeCN <sub>eq+ax</sub>  |
| -     | 479 | 478 vvs | 478 | -       | 479 | 479 vvs | 477 | 482 vvs | 483 | $\gamma$ NH                     |
| -     | -   | 446 vs  | -   | 443 vs  | -   | -       | 447 | 441 vs  | -   | $\nu$ Fe-C <sub>eq A'+A''</sub> |
| -     | -   | 427 s   | 427 | 426 s   | 424 | 421 s   | 421 | 424 s   | 423 | $\nu$ Fe-C <sub>eq A'</sub>     |
|       | 269 |         |     |         |     |         |     |         |     | $\tau$ Ring                     |
| -     | -   | -       | 230 | -       | 249 | -       | 191 | -       | 239 | $\nu$ M-N (Im)                  |
| -     | -   | -       | 203 | -       | 217 | -       | -   | -       | 210 | $\nu$ M-N(CN)                   |
| -     | 68  | -       | 145 | -       | 153 | -       | 140 | -       | 130 | $\tau$ CH <sub>3</sub>          |

<sup>a</sup> IR intensities; s: strong, m: medium, w: weak, v: very

<sup>b</sup> $\nu$ : stretching,  $\delta$ : bending,  $\gamma$  out-of-plane bending modes; a: anti-symmetric, s: symmetric
